# Supplementary material for: Transcriptional cooperation of PBX1 and PAX6 in adult neural progenitor cells
Source: Sci Rep. 2021 Oct 25;11:21013. doi: 10.1038/s41598-021-99968-5 (PMC8545929; doi:10.1038/s41598-021-99968-5)
Supplement: Supplementary file 3 — Supplementary Table 2. [file 41598_2021_99968_MOESM3_ESM.xlsx]

## Sheet: Table S2
Supplementary Table 2	Differentially expressed genes (DEGs) between normalized Pbx1 OE versus vector ctrl datasets
	3 DEGs with FDR <0.05 and fold change >1.5; of which 2 genes are up- and 1 gene is downregulated compared to vector ctrl (pClig)
Transcript ID	gene_assignment	Gene Symbol	RefSeq	p-value(Pbx1 OE vs. Control pClig)	Fold-Change(Pbx1 OE vs. Control pClig)	Fold-Change(Pbx1 OE vs. Control pClig) (Description)
10359870	NM_001291508 // Pbx1 // pre B cell leukemia homeobox 1 // 1 H2.3|1 75.95 cM // 18514 //	Pbx1	NM_001291508	1.01762e-05	2.23115	Pbx1 OE up vs Control pClig
10545874	NM_023493 // Cml5 // camello-like 5 // 6|6 C3 // 69049 /// ENSMUST00000032074 // Cml5 /	Cml5	NM_023493	0.000378249	1.98307	Pbx1 OE up vs Control pClig
10447649	NM_001081416 // Fndc1 // fibronectin type III domain containing 1 // 17|17 A1 // 68655	Fndc1	NM_001081416	0.000624683	-1.96382	Pbx1 OE down vs Control pClig
