# Supplementary material for: Transcriptional cooperation of PBX1 and PAX6 in adult neural progenitor cells
Source: Sci Rep. 2021 Oct 25;11:21013. doi: 10.1038/s41598-021-99968-5 (PMC8545929; doi:10.1038/s41598-021-99968-5)
Supplement: Supplementary file 4 — Supplementary Table 3. [file 41598_2021_99968_MOESM4_ESM.xlsx]

## Sheet: Table S3
Supplementary Table 3	Differentially expressed genes (DEGs) between normalized Pax6OE versus vector ctrl datasets
	120 DEGs coded by 126 transcripts with FDR <0.05 and fold change >1.5; of which 99 genes are up- (105 transcripts) and 21 genes are downregulated (21 transcripts) compared to vector ctrl (pClig)
	Transcripts validated by additional qPCR are highlighted in red, e.g. Ablim3, Atat1, Dcx
Transcript ID	gene_assignment	Gene Symbol	RefSeq	p-value(Control Pax6 vs. Control pClig)	Fold-Change(Control Pax6 vs. Control pClig)	Fold-Change(Control Pax6 vs. Control pClig) (Description)
10541354	NM_175628 // A2m // alpha-2-macroglobulin // 6 F1|6 57.49 cM // 232345 /// XM_011241322	A2m	NM_175628	0.001247	1.50575	Control Pax6 up vs Control pClig
10459262	NM_001164491 // Ablim3 // actin binding LIM protein family, member 3 // 18|18 E1 // 319	Ablim3	NM_001164491	1.75281e-06	4.03178	Control Pax6 up vs Control pClig
10467124	NM_007392 // Acta2 // actin, alpha 2, smooth muscle, aorta // 19|19 C3 // 11475 /// XM_	Acta2	NM_007392	8.17237e-06	-1.79936	Control Pax6 down vs Control pClig
10485982	NM_009608 // Actc1 // actin, alpha, cardiac muscle 1 // 2 E4|2 57.55 cM // 11464 /// EN	Actc1	NM_009608	8.82423e-05	-2.30052	Control Pax6 down vs Control pClig
10531193	NM_001081401 // Adamts3 // a disintegrin-like and metallopeptidase (reprolysin type) wi	Adamts3	NM_001081401	0.000175985	1.63837	Control Pax6 up vs Control pClig
10531191	NM_001081401 // Adamts3 // a disintegrin-like and metallopeptidase (reprolysin type) wi	Adamts3	NM_001081401	2.93989e-05	2.39943	Control Pax6 up vs Control pClig
10531187	NM_001081401 // Adamts3 // a disintegrin-like and metallopeptidase (reprolysin type) wi	Adamts3	NM_001081401	0.000172298	2.47721	Control Pax6 up vs Control pClig
10531197	NM_001081401 // Adamts3 // a disintegrin-like and metallopeptidase (reprolysin type) wi	Adamts3	NM_001081401	0.000331836	2.6889	Control Pax6 up vs Control pClig
10531177	NM_001081401 // Adamts3 // a disintegrin-like and metallopeptidase (reprolysin type) wi	Adamts3	NM_001081401	0.000317704	3.01244	Control Pax6 up vs Control pClig
10531183	NM_001081401 // Adamts3 // a disintegrin-like and metallopeptidase (reprolysin type) wi	Adamts3	NM_001081401	8.12639e-05	3.38925	Control Pax6 up vs Control pClig
10463911	NM_001164099 // Add3 // adducin 3 (gamma) // 19 D2|19 47.18 cM // 27360 /// NM_00116410	Add3	NM_001164099	9.29844e-05	1.54937	Control Pax6 up vs Control pClig
10593499	NM_001286641 // AI593442 // expressed sequence AI593442 // 9|9 A5.3 // 330941 /// NM_17	AI593442	NM_001286641	0.000225484	1.6319	Control Pax6 up vs Control pClig
10354677	NM_001081433 // Ankrd44 // ankyrin repeat domain 44 // 1|1 C1.1 // 329154 /// XM_006496	Ankrd44	NM_001081433	0.000444301	1.9526	Control Pax6 up vs Control pClig
10541968	NM_153589 // Ano2 // anoctamin 2 // 6|6 F3 // 243634 /// XM_006506115 // Ano2 // anocta	Ano2	NM_153589	0.000164639	2.77727	Control Pax6 up vs Control pClig
10440491	NM_001198823 // App // amyloid beta (A4) precursor protein // 16 46.92 cM|16 C3-qter //	App	NM_001198823	6.10098e-05	1.99947	Control Pax6 up vs Control pClig
10450622	NM_001142744 // Atat1 // alpha tubulin acetyltransferase 1 // 17|17 B3 // 73242 /// NM_	Atat1	NM_001142744	0.026163	1.52233	Control Pax6 up vs Control pClig
10534168	NM_177047 // Auts2 // autism susceptibility candidate 2 // 5|5 G2 // 319974 /// BC06607	Auts2	NM_177047	0.000115186	2.01509	Control Pax6 up vs Control pClig
10532032	NM_001005477 // Barhl2 // BarH-like 2 (Drosophila) // 5|5 E5 // 104382 /// ENSMUST00000	Barhl2	NM_001005477	5.32441e-05	1.99537	Control Pax6 up vs Control pClig
10476395	NM_007553 // Bmp2 // bone morphogenetic protein 2 // 2 F2|2 65.21 cM // 12156 /// XM_00	Bmp2	NM_007553	5.74348e-05	6.6301	Control Pax6 up vs Control pClig
10477423	NM_001034875 // Bpifb4 // BPI fold containing family B, member 4 // 2|2 H1 // 381399 //	Bpifb4	NM_001034875	0.000348091	2.84162	Control Pax6 up vs Control pClig
10531274	NM_007568 // Btc // betacellulin, epidermal growth factor family member // 5 E2|5 44.78	Btc	NM_007568	8.41614e-06	2.38176	Control Pax6 up vs Control pClig
10357875	NM_007570 // Btg2 // B cell translocation gene 2, anti-proliferative // 1 E4|1 58.1 cM	Btg2	NM_007570	0.000402583	-1.52594	Control Pax6 down vs Control pClig
10361250	NM_144817 // Camk1g // calcium/calmodulin-dependent protein kinase I gamma // 1 H6|1 97	Camk1g	NM_144817	6.08313e-05	5.23369	Control Pax6 up vs Control pClig
10509568	NM_025451 // Camk2n1 // calcium/calmodulin-dependent protein kinase II inhibitor 1 // 4	Camk2n1	NM_025451	0.000233629	1.71444	Control Pax6 up vs Control pClig
10518751	NM_009802 // Car6 // carbonic anhydrase 6 // 4|4 E2 // 12353 /// ENSMUST00000030817 //	Car6	NM_009802	2.48149e-05	5.11139	Control Pax6 up vs Control pClig
10511429	NM_007592 // Car8 // carbonic anhydrase 8 // 4 A1|4 3.53 cM // 12319 /// ENSMUST0000006	Car8	NM_007592	0.000403774	-2.35529	Control Pax6 down vs Control pClig
10411527	NM_001081493 // Cartpt // CART prepropeptide // 13|13 D1 // 27220 /// NM_013732 // Cart	Cartpt	NM_001081493	6.55461e-06	9.27677	Control Pax6 up vs Control pClig
10485213	NM_001136055 // Cd82 // CD82 antigen // 2 E1|2 51.62 cM // 12521 /// NM_001271430 // Cd	Cd82	NM_001136055	0.00060355	-1.60716	Control Pax6 down vs Control pClig
10565255	NM_030728 // Cemip // cell migration inducing protein, hyaluronan binding // 7 D3|7 48.	Cemip	NM_030728	0.000224643	3.84601	Control Pax6 up vs Control pClig
10540298	NM_007697 // Chl1 // cell adhesion molecule with homology to L1CAM // 6|6 E1 // 12661 /	Chl1	NM_007697	0.000183867	2.39514	Control Pax6 up vs Control pClig
10407591	NM_033269 // Chrm3 // cholinergic receptor, muscarinic 3, cardiac // 13 A1|13 3.72 cM /	Chrm3	NM_033269	0.000417362	2.13921	Control Pax6 up vs Control pClig
10585484	NM_176844 // Chrna5 // cholinergic receptor, nicotinic, alpha polypeptide 5 // 9 B|9 29	Chrna5	NM_176844	6.86534e-05	12.7233	Control Pax6 up vs Control pClig
10361828	NM_010828 // Cited2 // Cbp/p300-interacting transactivator, with Glu/Asp-rich carboxy-t	Cited2	NM_010828	0.000310492	1.59944	Control Pax6 up vs Control pClig
10595871	NM_022319 // Clstn2 // calsyntenin 2 // 9|9 E4 // 64085 /// XM_006511334 // Clstn2 // c	Clstn2	NM_022319	0.000122272	2.60495	Control Pax6 up vs Control pClig
10581069	NM_153582 // Cmtm4 // CKLF-like MARVEL transmembrane domain containing 4 // 8|8 D3 // 9	Cmtm4	NM_153582	0.000425449	1.55768	Control Pax6 up vs Control pClig
10546736	NM_008779 // Cntn3 // contactin 3 // 6 D3|6 47.52 cM // 18488 /// XM_006505725 // Cntn3	Cntn3	NM_008779	2.94252e-06	3.3906	Control Pax6 up vs Control pClig
10574220	NM_009142 // Cx3cl1 // chemokine (C-X3-C motif) ligand 1 // 8 C5|8 46.79 cM // 20312 //	Cx3cl1	NM_009142	0.000358915	2.27664	Control Pax6 up vs Control pClig
10506433	NM_010014 // Dab1 // disabled 1 // 4 C6|4 47.79 cM // 13131 /// NM_177259 // Dab1 // di	Dab1	NM_010014	9.77332e-06	1.99834	Control Pax6 up vs Control pClig
10459671	NM_007831 // Dcc // deleted in colorectal carcinoma // 18 E2|18 45.24 cM // 13176 /// X	Dcc	NM_007831	0.000245251	1.93114	Control Pax6 up vs Control pClig
10607156	NM_001110222 // Dcx // doublecortin // X|X F2 // 13193 /// NM_001110223 // Dcx // doubl	Dcx	NM_001110222	1.05273e-05	8.05368	Control Pax6 up vs Control pClig
10362701	NM_001316716 // Ddo // D-aspartate oxidase // 10|10 B1 // 70503 /// NM_001316717 // Ddo	Ddo	NM_001316716	0.00142887	1.66056	Control Pax6 up vs Control pClig
10420672	NM_173419 // Dleu7 // deleted in lymphocytic leukemia, 7 // 14|14 D1 // 239133 /// ENSM	Dleu7	NM_173419	0.000455752	-2.28182	Control Pax6 down vs Control pClig
10571312	NM_176933 // Dusp4 // dual specificity phosphatase 4 // 8|8 A4 // 319520 /// ENSMUST000	Dusp4	NM_176933	3.27845e-05	4.31732	Control Pax6 up vs Control pClig
10413243	NM_183389 // Duxbl1 // double homeobox B-like 1 // 14|14 A3 // 278672 /// XM_006518290	Duxbl1	NM_183389	0.0077353	-1.51095	Control Pax6 down vs Control pClig
10563780	NM_001013368 // E2f8 // E2F transcription factor 8 // 7|7 B4 // 108961 /// XM_006540553	E2f8	NM_001013368	2.67374e-06	-1.70762	Control Pax6 down vs Control pClig
10406817	NM_007930 // Enc1 // ectodermal-neural cortex 1 // 13|13 D1 // 13803 /// ENSMUST0000004	Enc1	NM_007930	5.49437e-05	-1.52596	Control Pax6 down vs Control pClig
10368289	NM_001308327 // Enpp1 // ectonucleotide pyrophosphatase/phosphodiesterase 1 // 10 A4|10	Enpp1	NM_001308327	0.000176124	1.82607	Control Pax6 up vs Control pClig
10447317	NM_010137 // Epas1 // endothelial PAS domain protein 1 // 17|17 E4 // 13819 /// ENSMUST	Epas1	NM_010137	6.65694e-05	2.14165	Control Pax6 up vs Control pClig
10446553	NM_013813 // Epb41l3 // erythrocyte membrane protein band 4.1 like 3 // 17 E1.3|17 40.1	Epb41l3	NM_013813	9.18092e-05	2.19006	Control Pax6 up vs Control pClig
10517488	NM_001290753 // Ephb2 // Eph receptor B2 // 4 69.0 cM|4 D-E // 13844 /// NM_010142 // E	Ephb2	NM_001290753	0.000268922	1.9438	Control Pax6 up vs Control pClig
10353192	NM_001252192 // Eya1 // eyes absent 1 homolog (Drosophila) // 1 A3|1 4.31 cM // 14048 /	Eya1	NM_001252192	3.89249e-06	2.60953	Control Pax6 up vs Control pClig
10503118	NM_173426 // Fam110b // family with sequence similarity 110, member B // 4|4 A1 // 2422	Fam110b	NM_173426	0.000164382	1.91247	Control Pax6 up vs Control pClig
10402211	NM_011812 // Fbln5 // fibulin 5 // 12|12 F1 // 23876 /// XM_006515864 // Fbln5 // fibul	Fbln5	NM_011812	7.53161e-05	2.86517	Control Pax6 up vs Control pClig
10355403	NM_001276408 // Fn1 // fibronectin 1 // 1 C1-C5|1 36.05 cM // 14268 /// NM_001276409 //	Fn1	NM_001276408	7.70635e-05	2.01837	Control Pax6 up vs Control pClig
10447649	NM_001081416 // Fndc1 // fibronectin type III domain containing 1 // 17|17 A1 // 68655	Fndc1	NM_001081416	0.000199823	-2.46998	Control Pax6 down vs Control pClig
10606333	NM_001007580 // Fndc3c1 // fibronectin type III domain containing 3C1 // X|X D // 33356	Fndc3c1	NM_001007580	5.83745e-06	-1.61911	Control Pax6 down vs Control pClig
10435641	NM_008047 // Fstl1 // follistatin-like 1 // 16 B3|16 26.48 cM // 14314 /// ENSMUST00000	Fstl1	NM_008047	0.000185335	1.67793	Control Pax6 up vs Control pClig
10469672	NM_008078 // Gad2 // glutamic acid decarboxylase 2 // 2 A3|2 15.15 cM // 14417 /// XM_0	Gad2	NM_008078	0.000384653	2.51003	Control Pax6 up vs Control pClig
10439514	NM_008083 // Gap43 // growth associated protein 43 // 16 B4|16 28.37 cM // 14432 /// EN	Gap43	NM_008083	0.00175353	1.59186	Control Pax6 up vs Control pClig
10350753	NM_008131 // Glul // glutamate-ammonia ligase (glutamine synthetase) // 1|1 G2 // 14645	Glul	NM_008131	0.000211818	1.56509	Control Pax6 up vs Control pClig
10376241	ENSMUST00000118330 // Gm12241 // predicted gene 12241 [Source:MGI Symbol;Acc:MGI:364971	Gm12241	ENSMUST00000118330	0.000213373	3.13129	Control Pax6 up vs Control pClig
10461856	NM_008137 // Gna14 // guanine nucleotide binding protein, alpha 14 // 19 A-B|19 11.29 c	Gna14	NM_008137	0.000124399	3.08105	Control Pax6 up vs Control pClig
10573979	NM_001113384 // Gnao1 // guanine nucleotide binding protein, alpha O // 8 C5|8 45.94 cM	Gnao1	NM_001113384	0.000275793	1.93014	Control Pax6 up vs Control pClig
10465820	NM_010316 // Gng3 // guanine nucleotide binding protein (G protein), gamma 3 // 19 A|19	Gng3	NM_010316	3.33669e-05	1.90841	Control Pax6 up vs Control pClig
10569335	NR_130973 // H19 // H19, imprinted maternally expressed transcript // 7 F5|7 87.97 cM /	H19	NR_130973	0.000104281	-2.14696	Control Pax6 down vs Control pClig
10604542	NM_001077202 // Hs6st2 // heparan sulfate 6-O-sulfotransferase 2 // X|X A3.3 // 50786 /	Hs6st2	NM_001077202	0.000199096	1.96835	Control Pax6 up vs Control pClig
10417048	NM_015820 // Hs6st3 // heparan sulfate 6-O-sulfotransferase 3 // 14|14 E4 // 50787 ///	Hs6st3	NM_015820	0.000111462	2.83713	Control Pax6 up vs Control pClig
10593233	NM_001099644 // Htr3a // 5-hydroxytryptamine (serotonin) receptor 3A // 9|9 A5.3 // 155	Htr3a	NM_001099644	0.000393136	-1.92388	Control Pax6 down vs Control pClig
10399691	NM_010496 // Id2 // inhibitor of DNA binding 2 // 12 8.57 cM|12 B // 15902 /// ENSMUST0	Id2	NM_010496	4.9762e-06	2.79771	Control Pax6 up vs Control pClig
10463732	NM_146100 // Ina // internexin neuronal intermediate filament protein, alpha // 19|19 C	Ina	NM_146100	2.89059e-05	1.57729	Control Pax6 up vs Control pClig
10400989	NM_172805 // Kcnh5 // potassium voltage-gated channel, subfamily H (eag-related), membe	Kcnh5	NM_172805	5.41373e-05	3.44846	Control Pax6 up vs Control pClig
10471994	NM_008449 // Kif5c // kinesin family member 5C // 2 C|2 28.68 cM // 16574 /// ENSMUST00	Kif5c	NM_008449	0.000801675	1.66417	Control Pax6 up vs Control pClig
10462912	NM_020278 // Lgi1 // leucine-rich repeat LGI family, member 1 // 19|19 C3 // 56839 ///	Lgi1	NM_020278	2.5396e-05	5.74711	Control Pax6 up vs Control pClig
10366229	NM_001033223 // Lin7a // lin-7 homolog A (C. elegans) // 10|10 D1 // 108030 /// NM_0010	Lin7a	NM_001033223	1.56968e-05	2.69687	Control Pax6 up vs Control pClig
10416800	NM_201529 // Lmo7 // LIM domain only 7 // 14 E2.3|14 50.9 cM // 380928 /// XM_006519176	Lmo7	NM_201529	0.000408804	1.7711	Control Pax6 up vs Control pClig
10517287	NM_207237 // Man1c1 // mannosidase, alpha, class 1C, member 1 // 4|4 D3 // 230815 /// X	Man1c1	NM_207237	7.48004e-05	2.31013	Control Pax6 up vs Control pClig
10361956	NM_001198635 // Map7 // microtubule-associated protein 7 // 10 A3|10 9.75 cM // 17761 /	Map7	NM_001198635	0.000255947	2.0812	Control Pax6 up vs Control pClig
10531869	NM_001081567 // Mapk10 // mitogen-activated protein kinase 10 // 5|5 E5 // 26414 /// NM	Mapk10	NM_001081567	0.000305686	1.56931	Control Pax6 up vs Control pClig
10554819	NM_181407 // Me3 // malic enzyme 3, NADP(+)-dependent, mitochondrial // 7|7 E1 // 10926	Me3	NM_181407	0.00135269	-1.84682	Control Pax6 down vs Control pClig
10495878	NM_022565 // Ndst4 // N-deacetylase/N-sulfotransferase (heparin glucosaminyl) 4 // 3|3	Ndst4	NM_022565	0.000155664	2.56874	Control Pax6 up vs Control pClig
10497051	NM_001039094 // Negr1 // neuronal growth regulator 1 // 3|3 H4 // 320840 /// NM_177274	Negr1	NM_001039094	0.000190405	2.37031	Control Pax6 up vs Control pClig
10583887	NM_175678 // Npsr1 // neuropeptide S receptor 1 // 9|9 A3-A4 // 319239 /// XM_006510400	Npsr1	NM_175678	0.000244806	9.07152	Control Pax6 up vs Control pClig
10538247	NM_023456 // Npy // neuropeptide Y // 6 24.04 cM|6 B3 // 109648 /// ENSMUST00000031843	Npy	NM_023456	0.000184522	2.98534	Control Pax6 up vs Control pClig
10470529	NM_001038612 // Olfm1 // olfactomedin 1 // 2|2 A3 // 56177 /// NM_001038613 // Olfm1 //	Olfm1	NM_001038612	5.14179e-05	2.76165	Control Pax6 up vs Control pClig
10473058	NM_001290733 // Osbpl6 // oxysterol binding protein-like 6 // 2|2 C3 // 99031 /// NM_00	Osbpl6	NM_001290733	0.000260162	1.69076	Control Pax6 up vs Control pClig
10523190	NM_145562 // Parm1 // prostate androgen-regulated mucin-like protein 1 // 5|5 E2 // 231	Parm1	NM_145562	0.000266303	3.53192	Control Pax6 up vs Control pClig
10474312	NM_001244198 // Pax6 // paired box 6 // 2 E3|2 55.31 cM // 18508 /// NM_001244200 // Pa	Pax6	NM_001244198	6.12667e-08	4.45095	Control Pax6 up vs Control pClig
10437205	NM_008791 // Pcp4 // Purkinje cell protein 4 // 16 C4|16 56.97 cM // 18546 /// ENSMUST0	Pcp4	NM_008791	0.000123432	3.15165	Control Pax6 up vs Control pClig
10495794	NM_153422 // Pde5a // phosphodiesterase 5A, cGMP-specific // 3|3 G1 // 242202 /// XM_00	Pde5a	NM_153422	0.000141998	4.04911	Control Pax6 up vs Control pClig
10536294	NM_001040611 // Peg10 // paternally expressed 10 // 6 A1|6 1.81 cM // 170676 /// NM_130	Peg10	NM_001040611	0.000324107	2.4871	Control Pax6 up vs Control pClig
10354649	NM_001163314 // Pgap1 // post-GPI attachment to proteins 1 // 1|1 C1.1 // 241062 /// EN	Pgap1	NM_001163314	0.000246419	1.79071	Control Pax6 up vs Control pClig
10352867	NM_008882 // Plxna2 // plexin A2 // 1|1 H6 // 18845 /// XM_006497240 // Plxna2 // plexi	Plxna2	NM_008882	0.00076194	1.65555	Control Pax6 up vs Control pClig
10425257	ENSMUST00000040077 // Polr2f // polymerase (RNA) II (DNA directed) polypeptide F // 15	Polr2f	ENSMUST00000040077	0.000158448	-1.50513	Control Pax6 down vs Control pClig
10479736	NM_025901 // Polr3k // polymerase (RNA) III (DNA directed) polypeptide K // 2|2 H4 // 6	Polr3k	NM_025901	0.0002302	-1.59164	Control Pax6 down vs Control pClig
10565456	NM_029614 // Prss23 // protease, serine 23 // 7|7 E1 // 76453 /// XM_006508299 // Prss2	Prss23	NM_029614	0.000574589	-3.01648	Control Pax6 down vs Control pClig
10554814	ENSMUST00000032858 // Prss23os // protease, serine 23, opposite strand [Source:MGI Symb	Prss23os	ENSMUST00000032858	0.000154922	-3.02754	Control Pax6 down vs Control pClig
10518492	NM_001083342 // Ptchd2 // patched domain containing 2 // 4|4 E2 // 242748 /// XM_006538	Ptchd2	NM_001083342	0.000190332	2.81338	Control Pax6 up vs Control pClig
10518494	NM_001083342 // Ptchd2 // patched domain containing 2 // 4|4 E2 // 242748 /// XM_006535	Ptchd2	NM_001083342	7.51584e-05	3.44336	Control Pax6 up vs Control pClig
10362314	NM_008983 // Ptprk // protein tyrosine phosphatase, receptor type, K // 10 A4|10 15.06	Ptprk	NM_008983	2.8368e-05	1.56686	Control Pax6 up vs Control pClig
10595840	NM_001289645 // Pxylp1 // 2-phosphoxylose phosphatase 1 // 9|9 E3.3 // 235534 /// NM_00	Pxylp1	NM_001289645	0.000130372	2.12125	Control Pax6 up vs Control pClig
10422946	NM_198024 // Ranbp3l // RAN binding protein 3-like // 15|15 A1 // 223332 /// ENSMUST000	Ranbp3l	NM_198024	0.00011384	2.97431	Control Pax6 up vs Control pClig
10364784	NM_001204931 // Reep6 // receptor accessory protein 6 // 10|10 C1 // 70335 /// NM_13929	Reep6	NM_001204931	0.000178212	1.91598	Control Pax6 up vs Control pClig
10354777	NM_139146 // Satb2 // special AT-rich sequence binding protein 2 // 1|1 C1.3 // 212712	Satb2	NM_139146	0.000275551	2.37773	Control Pax6 up vs Control pClig
10595033	NM_001164790 // Scg3 // secretogranin III // 9 D|9 42.32 cM // 20255 /// NM_009130 // S	Scg3	NM_001164790	1.15576e-05	2.06963	Control Pax6 up vs Control pClig
10544875	NM_027268 // Scrn1 // secernin 1 // 6|6 B3 // 69938 /// XM_006506572 // Scrn1 // secern	Scrn1	NM_027268	8.67565e-05	2.00754	Control Pax6 up vs Control pClig
10495830	NM_027135 // Sec24d // Sec24 related gene family, member D (S. cerevisiae) // 3|3 G3 //	Sec24d	NM_027135	0.00011232	1.5228	Control Pax6 up vs Control pClig
10519886	NM_013657 // Sema3c // sema domain, immunoglobulin domain (Ig), short basic domain, sec	Sema3c	NM_013657	1.18366e-05	7.81126	Control Pax6 up vs Control pClig
10423520	NM_009154 // Sema5a // sema domain, seven thrombospondin repeats (type 1 and type 1-lik	Sema5a	NM_009154	0.000129861	2.02533	Control Pax6 up vs Control pClig
10427590	NM_148938 // Slc1a3 // solute carrier family 1 (glial high affinity glutamate transport	Slc1a3	NM_148938	0.000393505	1.58987	Control Pax6 up vs Control pClig
10576586	NM_175434 // Slc35f3 // solute carrier family 35, member F3 // 8|8 E2 // 210027 /// XM_	Slc35f3	NM_175434	8.86382e-05	2.79896	Control Pax6 up vs Control pClig
10523021	NM_001136260 // Slc4a4 // solute carrier family 4 (anion exchanger), member 4 // 5|5 E2	Slc4a4	NM_001136260	0.000249297	2.27193	Control Pax6 up vs Control pClig
10595496	NM_001277982 // Snap91 // synaptosomal-associated protein 91 // 9|9 E3.2 // 20616 /// N	Snap91	NM_001277982	3.93321e-05	2.23892	Control Pax6 up vs Control pClig
10455721	NM_001199151 // Sncaip // synuclein, alpha interacting protein (synphilin) // 18|18 D1	Sncaip	NM_001199151	0.000353315	-1.92094	Control Pax6 down vs Control pClig
10531931	NM_010097 // Sparcl1 // SPARC-like 1 // 5 50.55 cM|5 E4 // 13602 /// XM_006534768 // Sp	Sparcl1	NM_010097	0.000104101	2.73116	Control Pax6 up vs Control pClig
10502881	NM_012028 // St6galnac5 // ST6 (alpha-N-acetyl-neuraminyl-2,3-beta-galactosyl-1,3)-N-ac	St6galnac5	NM_012028	6.9321e-06	4.50488	Control Pax6 up vs Control pClig
10549162	NM_011374 // St8sia1 // ST8 alpha-N-acetyl-neuraminide alpha-2,8-sialyltransferase 1 //	St8sia1	NM_011374	9.38829e-06	3.12865	Control Pax6 up vs Control pClig
10381934	NM_181071 // Tanc2 // tetratricopeptide repeat, ankyrin repeat and coiled-coil containi	Tanc2	NM_181071	1.11672e-05	2.79114	Control Pax6 up vs Control pClig
10447951	NM_011581 // Thbs2 // thrombospondin 2 // 17 A3-B|17 8.95 cM // 21826 /// ENSMUST000001	Thbs2	NM_011581	3.03441e-05	-2.58874	Control Pax6 down vs Control pClig
10426467	NM_178789 // Tmem117 // transmembrane protein 117 // 15|15 E3 // 320709 /// ENSMUST0000	Tmem117	NM_178789	5.83319e-05	3.30091	Control Pax6 up vs Control pClig
10604175	NM_001289727 // Tmem255a // transmembrane protein 255A // X|X A3.3 // 245386 /// NM_001	Tmem255a	NM_001289727	0.00103733	1.73525	Control Pax6 up vs Control pClig
10485198	NM_183180 // Tspan18 // tetraspanin 18 // 2|2 E1 // 241556 /// XM_006499474 // Tspan18	Tspan18	NM_183180	0.000484294	1.95108	Control Pax6 up vs Control pClig
10475027	NM_001290800 // Tyro3 // TYRO3 protein tyrosine kinase 3 // 2 59.97 cM|2 F // 22174 ///	Tyro3	NM_001290800	0.000578156	-2.03868	Control Pax6 down vs Control pClig
10410460	NM_001145162 // Ube2ql1 // ubiquitin-conjugating enzyme E2Q family-like 1 // 13|13 C1 /	Ube2ql1	NM_001145162	5.65525e-05	3.04354	Control Pax6 up vs Control pClig
10522208	NM_011670 // Uchl1 // ubiquitin carboxy-terminal hydrolase L1 // 5 C3.1|5 35.95 cM // 2	Uchl1	NM_011670	7.84422e-05	2.06592	Control Pax6 up vs Control pClig
10575693	NM_173016 // Vat1l // vesicle amine transport protein 1 homolog-like (T. californica) /	Vat1l	NM_173016	3.70296e-06	8.0134	Control Pax6 up vs Control pClig
10417176	NM_009574 // Zic2 // zinc finger protein of the cerebellum 2 // 14 E5|14 65.97 cM // 22	Zic2	NM_009574	0.000261783	1.80433	Control Pax6 up vs Control pClig
