# Supplementary material for: Transcriptional cooperation of PBX1 and PAX6 in adult neural progenitor cells
Source: Sci Rep. 2021 Oct 25;11:21013. doi: 10.1038/s41598-021-99968-5 (PMC8545929; doi:10.1038/s41598-021-99968-5)
Supplement: Supplementary file 5 — Supplementary Table 4. [file 41598_2021_99968_MOESM5_ESM.xlsx]

## Sheet: Table S5
Supplementary Table 4	Functional annotation chart from the DAVID online ressource
	DEGs that are co-regulated by Pbx1 and Pax6 were submitted to DAVID and the functional annotation chart was exported. DEGs submitted for analysis resemble those used for Venn Diagramm Pax6 OE Up Pbx1 KD Down from table S1.4. Only GO Terms from column B, named Term were uploaded to REVIGO, together with p-values from column E, PValue.
Category	Term	Count	%	PValue	Genes	List Total	Pop Hits	Pop Total	Fold Enrichment	Bonferroni	Benjamini	FDR
UP_KEYWORDS	Membrane	30	47.619	0.0884036	NPSR1, APP, CHRM3, CEMIP, PARM1, SLC35F3, CHRNA5, HS6ST2, UCHL1, CAMK2N1, PTCHD2, NDST4, EPB41L3, MAN1C1, KCNH5, NEGR1, TMEM255A, ST8SIA1, PAX6, SNAP91, ANO2, ATAT1, MAPK10, BTC, TMEM117, PXYLP1, CNTN3, REEP6, CAMK1G, ST6GALNAC5	62	8683	22680	1.26387	0.999995	0.734855	0.707229
GOTERM_CC_DIRECT	GO:0016020~membrane	29	46.0317	0.0401338	NPSR1, APP, CHRM3, CEMIP, PARM1, SLC35F3, CHRNA5, HS6ST2, UCHL1, CAMK2N1, PTCHD2, NDST4, EPB41L3, MAN1C1, KCNH5, NEGR1, TMEM255A, ST8SIA1, SNAP91, ANO2, ATAT1, MAPK10, BTC, TMEM117, PXYLP1, CNTN3, REEP6, CAMK1G, ST6GALNAC5	60	6998	19662	1.358	0.990232	0.412284	0.394041
UP_KEYWORDS	Glycoprotein	27	42.8571	1.86483e-06	NPSR1, APP, CHRM3, CEMIP, PARM1, CHRNA5, SEMA3C, FBLN5, HS6ST2, UCHL1, PTCHD2, NDST4, CAR6, LGI1, KCNH5, NEGR1, ST8SIA1, SNAP91, ANO2, BTC, OLFM1, BMP2, BPIFB4, TMEM117, PXYLP1, CNTN3, ST6GALNAC5	62	3815	22680	2.58893	0.000247992	0.000248023	0.000238699
UP_SEQ_FEATURE	glycosylation site:N-linked (GlcNAc...)	26	41.2698	2.07655e-05	NPSR1, APP, CHRM3, CEMIP, PARM1, CHRNA5, SEMA3C, FBLN5, HS6ST2, PTCHD2, NDST4, CAR6, LGI1, KCNH5, NEGR1, ST8SIA1, ANO2, BTC, OLFM1, PCP4, BMP2, BPIFB4, TMEM117, PXYLP1, CNTN3, ST6GALNAC5	57	3563	18012	2.30592	0.00550846	0.00554439	0.00554439
UP_KEYWORDS	Alternative splicing	20	31.746	0.0423969	LGI1, APP, CEMIP, EYA1, CHRNA5, TMEM255A, CITED2, SATB2, PAX6, CARTPT, HS6ST2, SNAP91, MAPK10, ATAT1, OLFM1, RANBP3L, BPIFB4, PTCHD2, EPB41L3, REEP6	62	4779	22680	1.53089	0.996855	0.512617	0.493346
UP_KEYWORDS	Signal	19	30.1587	0.0500253	LGI1, APP, CEMIP, PARM1, NEGR1, CHRNA5, SEMA3C, CARTPT, FBLN5, DDO, BTC, OLFM1, UCHL1, BMP2, ADAMTS3, BPIFB4, NPY, CNTN3, CAR6	62	4543	22680	1.5299	0.998914	0.512678	0.493404
UP_KEYWORDS	Disulfide bond	18	28.5714	0.00288607	NPSR1, APP, CHRM3, NEGR1, CHRNA5, SEMA3C, ST8SIA1, CARTPT, FBLN5, BTC, OLFM1, BMP2, ADAMTS3, BPIFB4, NDST4, CNTN3, CAR6, ST6GALNAC5	62	3124	22680	2.10772	0.319142	0.0639745	0.0615694
UP_SEQ_FEATURE	signal peptide	18	28.5714	0.0117851	LGI1, APP, CEMIP, PARM1, NEGR1, CHRNA5, SEMA3C, CARTPT, FBLN5, BTC, OLFM1, PCP4, BMP2, BPIFB4, NPY, PXYLP1, CNTN3, CAR6	57	3124	18012	1.82074	0.957295	0.786652	0.786652
UP_SEQ_FEATURE	disulfide bond	17	26.9841	0.00323165	NPSR1, APP, CHRM3, NEGR1, CHRNA5, SEMA3C, ST8SIA1, CARTPT, FBLN5, BTC, OLFM1, PCP4, BMP2, NDST4, CNTN3, CAR6, ST6GALNAC5	57	2510	18012	2.14024	0.577265	0.431425	0.431425
UP_KEYWORDS	Developmental protein	11	17.4603	0.000254822	OLFM1, BARHL2, BMP2, EYA1, ZIC2, SEMA3C, CITED2, SATB2, ID2, DCX, PAX6	62	976	22680	4.12282	0.0333277	0.0138452	0.0133247
GOTERM_BP_DIRECT	GO:0007275~multicellular organism development	11	17.4603	0.000959432	OLFM1, BARHL2, BMP2, EYA1, ZIC2, SEMA3C, CITED2, SATB2, ID2, DCX, PAX6	56	1029	18082	3.45172	0.420841	0.227594	0.226794
GOTERM_CC_DIRECT	GO:0005615~extracellular space	11	17.4603	0.0133178	LGI1, BTC, OLFM1, APP, BMP2, ADAMTS3, SEMA3C, NPY, CARTPT, CAR6, FBLN5	60	1504	19662	2.39674	0.780196	0.300982	0.287664
UP_KEYWORDS	Secreted	11	17.4603	0.013827	LGI1, BTC, OLFM1, CEMIP, BMP2, BPIFB4, SEMA3C, NPY, CARTPT, CAR6, FBLN5	62	1685	22680	2.38805	0.843049	0.229873	0.221232
GOTERM_CC_DIRECT	GO:0005576~extracellular region	11	17.4603	0.034564	LGI1, BTC, OLFM1, CEMIP, BMP2, BPIFB4, SEMA3C, NPY, CARTPT, CAR6, FBLN5	60	1753	19662	2.0563	0.981218	0.39592	0.378401
GOTERM_BP_DIRECT	GO:0045944~positive regulation of transcription from RNA polymerase II promoter	10	15.873	0.00288609	APP, BARHL2, BMP2, EYA1, AUTS2, ZIC2, ABLIM3, CITED2, SATB2, PAX6	56	995	18082	3.24515	0.806902	0.328437	0.327283
GOTERM_CC_DIRECT	GO:0005794~Golgi apparatus	10	15.873	0.00862233	ATAT1, APP, PARM1, ST8SIA1, NPY, NDST4, MAN1C1, PXYLP1, CAMK1G, ST6GALNAC5	60	1190	19662	2.75378	0.624143	0.243581	0.232803
UP_KEYWORDS	Differentiation	8	12.6984	0.00169337	BMP2, ZIC2, SEMA3C, CITED2, PTCHD2, PEG10, DCX, PAX6	62	646	22680	4.53011	0.20181	0.0563045	0.0541878
GOTERM_BP_DIRECT	GO:0030154~cell differentiation	8	12.6984	0.00906095	BMP2, ZIC2, SEMA3C, CITED2, PTCHD2, PEG10, DCX, PAX6	56	780	18082	3.31172	0.994367	0.592335	0.590253
GOTERM_BP_DIRECT	GO:0007399~nervous system development	7	11.1111	0.000966653	OLFM1, APP, BARHL2, ZIC2, SEMA3C, DCX, CNTN3	56	377	18082	5.99536	0.423218	0.227594	0.226794
GOTERM_CC_DIRECT	GO:0043005~neuron projection	7	11.1111	0.00158819	MAPK10, APP, PCP4, CAMK2N1, NPY, DCX, CAMK1G	60	420	19662	5.46167	0.164403	0.0897329	0.0857624
UP_KEYWORDS	Cell junction	7	11.1111	0.0085542	LGI1, ATAT1, OLFM1, CHRM3, CHRNA5, CAMK2N1, EPB41L3	62	661	22680	3.8739	0.681012	0.16253	0.15642
GOTERM_CC_DIRECT	GO:0030054~cell junction	7	11.1111	0.0202943	LGI1, ATAT1, OLFM1, CHRM3, CHRNA5, CAMK2N1, EPB41L3	60	718	19662	3.19485	0.901416	0.382209	0.365297
GOTERM_MF_DIRECT	GO:0008270~zinc ion binding	7	11.1111	0.0989737	ADAMTS3, ABLIM3, PEG10, LMO7, SEC24D, CAR6, VAT1L	53	1075	17446	2.14343	1	1	1
GOTERM_CC_DIRECT	GO:0000139~Golgi membrane	6	9.52381	0.00713428	PARM1, NDST4, MAN1C1, PXYLP1, CAMK1G, ST6GALNAC5	60	403	19662	4.87891	0.554725	0.243581	0.232803
GOTERM_BP_DIRECT	GO:0045893~positive regulation of transcription, DNA-templated	6	9.52381	0.0303541	BMP2, EYA1, ZIC2, CITED2, ID2, PAX6	56	576	18082	3.36347	1	1	0.998239
UP_KEYWORDS	Golgi apparatus	6	9.52381	0.0516347	PARM1, ST8SIA1, NDST4, PXYLP1, CAMK1G, ST6GALNAC5	62	753	22680	2.91479	0.999134	0.512678	0.493404
UP_KEYWORDS	Synapse	5	7.93651	0.0155861	LGI1, OLFM1, CHRM3, CHRNA5, CAMK2N1	62	357	22680	5.12334	0.876223	0.230328	0.221669
GOTERM_CC_DIRECT	GO:0030424~axon	5	7.93651	0.0249548	ATAT1, OLFM1, APP, PCP4, UCHL1	60	370	19662	4.42838	0.942483	0.39592	0.378401
UP_KEYWORDS	Signal-anchor	5	7.93651	0.0304252	ST8SIA1, NDST4, PXYLP1, HS6ST2, ST6GALNAC5	62	439	22680	4.16636	0.983582	0.404655	0.389443
GOTERM_BP_DIRECT	GO:0010628~positive regulation of gene expression	5	7.93651	0.0329672	OLFM1, BMP2, CITED2, ID2, PAX6	56	399	18082	4.04628	1	1	0.998239
GOTERM_CC_DIRECT	GO:0030425~dendrite	5	7.93651	0.0593381	CHRM3, CHRNA5, NEGR1, CAMK2N1, DCX	60	490	19662	3.34388	0.999005	0.515785	0.492962
GOTERM_CC_DIRECT	GO:0045202~synapse	5	7.93651	0.064828	LGI1, OLFM1, CHRM3, CHRNA5, CAMK2N1	60	505	19662	3.24455	0.999486	0.523255	0.500102
GOTERM_CC_DIRECT	GO:0043025~neuronal cell body	5	7.93651	0.0761757	OLFM1, UCHL1, CHRNA5, NEGR1, CAMK2N1	60	534	19662	3.06835	0.999871	0.537991	0.514186
UP_KEYWORDS	Coated pit	4	6.34921	0.000312297	ATAT1, APP, CEMIP, SNAP91	62	49	22680	29.8618	0.040691	0.0138452	0.0133247
GOTERM_CC_DIRECT	GO:0005905~clathrin-coated pit	4	6.34921	0.00077773	ATAT1, APP, CEMIP, SNAP91	60	60	19662	21.8467	0.0841637	0.0878835	0.0839948
GOTERM_BP_DIRECT	GO:0045165~cell fate commitment	4	6.34921	0.00136903	BARHL2, BMP2, EYA1, PAX6	56	72	18082	17.9385	0.541371	0.227594	0.226794
GOTERM_BP_DIRECT	GO:0045665~negative regulation of neuron differentiation	4	6.34921	0.00159996	APP, PTCHD2, ID2, PAX6	56	76	18082	16.9944	0.59792	0.227594	0.226794
GOTERM_BP_DIRECT	GO:0007409~axonogenesis	4	6.34921	0.0042274	APP, UCHL1, PAX6, SNAP91	56	107	18082	12.0708	0.910229	0.400898	0.399489
GOTERM_BP_DIRECT	GO:0001764~neuron migration	4	6.34921	0.00636979	BARHL2, SATB2, DCX, PAX6	56	124	18082	10.4159	0.973643	0.517773	0.515953
GOTERM_MF_DIRECT	GO:0005516~calmodulin binding	4	6.34921	0.016979	PCP4, KCNH5, DCX, CAMK1G	53	182	17446	7.2345	0.944651	1	1
GOTERM_CC_DIRECT	GO:0045211~postsynaptic membrane	4	6.34921	0.0290642	CHRM3, CHRNA5, CAMK2N1, SNAP91	60	222	19662	5.9045	0.964312	0.39592	0.378401
GOTERM_CC_DIRECT	GO:0014069~postsynaptic density	4	6.34921	0.0350372	MAPK10, CAMK2N1, EPB41L3, SNAP91	60	239	19662	5.48452	0.98223	0.39592	0.378401
GOTERM_BP_DIRECT	GO:0007507~heart development	4	6.34921	0.0450328	BMP2, SEMA3C, CITED2, ID2	56	261	18082	4.94855	1	1	0.998239
GOTERM_MF_DIRECT	GO:0001077~transcriptional activator activity, RNA polymerase II core promoter proximal region sequence-specific binding	4	6.34921	0.046498	BARHL2, ZIC2, SATB2, PAX6	53	270	17446	4.87659	0.99968	1	1
GOTERM_BP_DIRECT	GO:0010629~negative regulation of gene expression	4	6.34921	0.0467498	OLFM1, BMP2, CITED2, ID2	56	265	18082	4.87385	1	1	0.998239
UP_KEYWORDS	Neuropeptide	3	4.7619	0.00239175	NPSR1, NPY, CARTPT	62	27	22680	40.6452	0.272749	0.0636205	0.0612288
GOTERM_BP_DIRECT	GO:0001658~branching involved in ureteric bud morphogenesis	3	4.7619	0.00936909	BMP2, EYA1, CITED2	56	48	18082	20.1808	0.995281	0.592335	0.590253
GOTERM_BP_DIRECT	GO:0003151~outflow tract morphogenesis	3	4.7619	0.0117485	EYA1, SEMA3C, CITED2	56	54	18082	17.9385	0.998799	0.626541	0.624339
UP_SEQ_FEATURE	compositionally biased region:His-rich	3	4.7619	0.0189691	BARHL2, CITED2, PEG10	57	68	18012	13.9412	0.993868	1	1
GOTERM_BP_DIRECT	GO:0007218~neuropeptide signaling pathway	3	4.7619	0.0224254	NPSR1, NPY, CARTPT	56	76	18082	12.7458	0.999998	0.978709	0.975269
GOTERM_CC_DIRECT	GO:0043195~terminal bouton	3	4.7619	0.0453021	APP, NPY, SNAP91	60	113	19662	8.7	0.994693	0.426595	0.407719
UP_KEYWORDS	Calmodulin-binding	3	4.7619	0.0539661	PCP4, KCNH5, CAMK1G	62	139	22680	7.8951	0.999375	0.512678	0.493404
INTERPRO	IPR013098:Immunoglobulin I-set	3	4.7619	0.0625987	NEGR1, SEMA3C, CNTN3	58	147	20594	7.24631	0.999995	1	1
GOTERM_BP_DIRECT	GO:0031175~neuron projection development	3	4.7619	0.0668993	LGI1, APP, NPY	56	139	18082	6.96891	1	1	0.998239
GOTERM_CC_DIRECT	GO:0043204~perikaryon	3	4.7619	0.0746215	MAPK10, OLFM1, NPY	60	150	19662	6.554	0.999844	0.537991	0.514186
GOTERM_BP_DIRECT	GO:0007411~axon guidance	3	4.7619	0.0754634	LGI1, SEMA3C, PAX6	56	149	18082	6.5012	1	1	0.998239
UP_KEYWORDS	Postsynaptic cell membrane	3	4.7619	0.0814171	CHRM3, CHRNA5, CAMK2N1	62	176	22680	6.23534	0.999988	0.721898	0.694759
KEGG_PATHWAY	mmu04550:Signaling pathways regulating pluripotency of stem cells	3	4.7619	0.0838352	BMP2, ID2, PAX6	28	138	7691	5.97127	0.999009	1	1
UP_SEQ_FEATURE	short sequence motif:Basolateral sorting signal	2	3.1746	0.00929866	APP, CHRM3	57	3	18012	210.667	0.916676	0.786652	0.786652
GOTERM_BP_DIRECT	GO:0002521~leukocyte differentiation	2	3.1746	0.0121124	CITED2, ID2	56	4	18082	161.446	0.999026	0.626541	0.624339
GOTERM_MF_DIRECT	GO:0032050~clathrin heavy chain binding	2	3.1746	0.0177535	CEMIP, SNAP91	53	6	17446	109.723	0.951554	1	1
GOTERM_BP_DIRECT	GO:0021902~commitment of neuronal cell to specific neuron type in forebrain	2	3.1746	0.0211021	SATB2, PAX6	56	7	18082	92.2551	0.999995	0.978709	0.975269
GOTERM_BP_DIRECT	GO:0021978~telencephalon regionalization	2	3.1746	0.0240807	BMP2, PAX6	56	8	18082	80.7232	0.999999	0.978709	0.975269
GOTERM_BP_DIRECT	GO:0008343~adult feeding behavior	2	3.1746	0.0300114	NPY, CARTPT	56	10	18082	64.5786	1	1	0.998239
GOTERM_BP_DIRECT	GO:0060013~righting reflex	2	3.1746	0.0329634	NPSR1, AUTS2	56	11	18082	58.7078	1	1	0.998239
GOTERM_BP_DIRECT	GO:0048711~positive regulation of astrocyte differentiation	2	3.1746	0.0359066	BMP2, ID2	56	12	18082	53.8155	1	1	0.998239
UP_SEQ_FEATURE	site:Susceptible to oxidation	2	3.1746	0.0366881	APP, UCHL1	57	12	18012	52.6667	0.999952	1	1
GOTERM_BP_DIRECT	GO:0060317~cardiac epithelial to mesenchymal transition	2	3.1746	0.0388411	OLFM1, BMP2	56	13	18082	49.6758	1	1	0.998239
GOTERM_BP_DIRECT	GO:2000178~negative regulation of neural precursor cell proliferation	2	3.1746	0.0417667	ID2, PAX6	56	14	18082	46.1276	1	1	0.998239
GOTERM_BP_DIRECT	GO:0030516~regulation of axon extension	2	3.1746	0.0417667	OLFM1, BARHL2	56	14	18082	46.1276	1	1	0.998239
GOTERM_BP_DIRECT	GO:0048596~embryonic camera-type eye morphogenesis	2	3.1746	0.0504914	CITED2, PAX6	56	17	18082	37.9874	1	1	0.998239
KEGG_PATHWAY	mmu00604:Glycosphingolipid biosynthesis - ganglio series	2	3.1746	0.0514301	ST8SIA1, ST6GALNAC5	28	15	7691	36.6238	0.984566	1	1
GOTERM_BP_DIRECT	GO:0001709~cell fate determination	2	3.1746	0.0533822	BARHL2, PAX6	56	18	18082	35.877	1	1	0.998239
INTERPRO	IPR001675:Glycosyl transferase, family 29	2	3.1746	0.0539485	ST8SIA1, ST6GALNAC5	58	20	20594	35.5069	0.999973	1	1
GOTERM_MF_DIRECT	GO:0042166~acetylcholine binding	2	3.1746	0.0551658	CHRM3, CHRNA5	53	19	17446	34.6495	0.999932	1	1
GOTERM_MF_DIRECT	GO:0008373~sialyltransferase activity	2	3.1746	0.057985	ST8SIA1, ST6GALNAC5	53	20	17446	32.917	0.999959	1	1
GOTERM_MF_DIRECT	GO:0015464~acetylcholine receptor activity	2	3.1746	0.057985	CHRM3, CHRNA5	53	20	17446	32.917	0.999959	1	1
GOTERM_MF_DIRECT	GO:0004683~calmodulin-dependent protein kinase activity	2	3.1746	0.0607961	DCX, CAMK1G	53	21	17446	31.3495	0.999975	1	1
GOTERM_MF_DIRECT	GO:0070412~R-SMAD binding	2	3.1746	0.0691798	RANBP3L, PAX6	53	24	17446	27.4308	0.999995	1	1
GOTERM_BP_DIRECT	GO:0035335~peptidyl-tyrosine dephosphorylation	2	3.1746	0.0705466	DUSP4, EYA1	56	24	18082	26.9077	1	1	0.998239
INTERPRO	IPR020636:Calcium/calmodulin-dependent/calcium-dependent protein kinase	2	3.1746	0.0721465	DCX, CAMK1G	58	27	20594	26.3014	0.999999	1	1
GOTERM_BP_DIRECT	GO:0021772~olfactory bulb development	2	3.1746	0.0733775	ID2, PAX6	56	25	18082	25.8314	1	1	0.998239
GOTERM_BP_DIRECT	GO:0000132~establishment of mitotic spindle orientation	2	3.1746	0.0733775	EYA1, PAX6	56	25	18082	25.8314	1	1	0.998239
GOTERM_BP_DIRECT	GO:0045475~locomotor rhythm	2	3.1746	0.0761999	MAPK10, ID2	56	26	18082	24.8379	1	1	0.998239
KEGG_PATHWAY	mmu00534:Glycosaminoglycan biosynthesis - heparan sulfate / heparin	2	3.1746	0.0810552	NDST4, HS6ST2	28	24	7691	22.8899	0.998741	1	1
GOTERM_MF_DIRECT	GO:0005184~neuropeptide hormone activity	2	3.1746	0.08299	NPY, CARTPT	53	29	17446	22.7014	1	1	1
GOTERM_BP_DIRECT	GO:0007271~synaptic transmission, cholinergic	2	3.1746	0.0874054	CHRM3, CHRNA5	56	30	18082	21.5262	1	1	0.998239
GOTERM_BP_DIRECT	GO:0045664~regulation of neuron differentiation	2	3.1746	0.0901858	EYA1, PAX6	56	31	18082	20.8318	1	1	0.998239
GOTERM_BP_DIRECT	GO:0045777~positive regulation of blood pressure	2	3.1746	0.0901858	ID2, CARTPT	56	31	18082	20.8318	1	1	0.998239
GOTERM_MF_DIRECT	GO:0035035~histone acetyltransferase binding	2	3.1746	0.0938932	CITED2, PAX6	53	33	17446	19.9497	1	1	1
GOTERM_BP_DIRECT	GO:0007586~digestion	2	3.1746	0.0957218	CHRM3, NPY	56	33	18082	19.5693	1	1	0.998239
GOTERM_BP_DIRECT	GO:0051281~positive regulation of release of sequestered calcium ion into cytosol	2	3.1746	0.0957218	NPSR1, CEMIP	56	33	18082	19.5693	1	1	0.998239
GOTERM_BP_DIRECT	GO:0010718~positive regulation of epithelial to mesenchymal transition	2	3.1746	0.0984774	OLFM1, BMP2	56	34	18082	18.9937	1	1	0.998239
GOTERM_BP_DIRECT	GO:0007631~feeding behavior	2	3.1746	0.0984774	NEGR1, NPY	56	34	18082	18.9937	1	1	0.998239
