# Supplementary material for: Transcriptional cooperation of PBX1 and PAX6 in adult neural progenitor cells
Source: Sci Rep. 2021 Oct 25;11:21013. doi: 10.1038/s41598-021-99968-5 (PMC8545929; doi:10.1038/s41598-021-99968-5)
Supplement: Supplementary file 7 — Supplementary Table 6. [file 41598_2021_99968_MOESM7_ESM.xlsx]

## Sheet: Table S6
Supplementary Table 6	ISMARA analysis motifs sorted by significance
	CEL files of the samples Pax6OE, Pax6OE/Pbx1KD, and empty vector control were uploaded to ISMARA (https://ismara.unibas.ch) and
	normalized within ISMARA standard mode settings including the averaging across sample replicates.
	Motifs validated by ChIP-qPCR are highlighted in red
motif name	Z-value
Rfx3_Rfx1_Rfx4	7.781467
Rfx2_Rfx7	5.796175
Tfeb_Usf1_Srebf1_Usf2_Bhlhe41_Srebf2	4.949589
Wrnip1_Mta3_Rcor1	4.224342
Hoxb7	4.003279
Irf2_Irf1_Irf8_Irf9_Irf7	3.882624
Pou1f1	3.621104
Pbx1_Pbx3	3.492887
UGUGCUU	3.087656
Tcf7_Tcf7l2	2.886241
Tead3_Tead4	2.861209
Foxj3_Tbl1xr1	2.860762
Nfix	2.824850
Gata3	2.789641
Klf12_Klf14_Sp4	2.758682
Nfia	2.741586
Hic1	2.727244
Irx6_Irx2_Irx3	2.726844
Nfatc1	2.618687
Tbx5	2.600757
Hdx	2.499706
Sp1	2.494401
Mecp2	2.471437
Pou5f1	2.414773
Yy1_Yy2	2.377439
Foxa2_Foxa1	2.371090
Nfil3_Tef	2.349706
Onecut1_Cux2	2.329015
E2f2_E2f5	2.326639
Nr1i3	2.286576
Mef2c	2.285032
Chd1_Pml	2.277672
Dmc1	2.224888
Neurod1	2.186747
Erg	2.155666
Atf6	2.145626
Pou2f3	2.129537
Arntl_Tfe3_Mlx_Mitf_Mlxipl_Tfec	2.104919
Fli1	2.101083
Sox2	2.099349
Hoxa2	2.095524
Lhx2_Hoxc5	2.084883
Zfx_Zfp711	2.068471
Hoxa6	2.054780
Nkx2-4	2.034626
Msx1_Lhx9_Barx1_Rax_Dlx6	2.026502
Tfap2d	2.020096
Etv1_Etv5_Gabpa	2.008401
Nr2e3	1.988899
Elf1_Elf2_Etv2_Elf4	1.981636
UUGGCAC	1.979050
Rad21_Smc3	1.960359
Plag1	1.932009
Ets2	1.923883
Nfe2l2	1.915812
Tbp	1.914055
Zfp219_Zfp740	1.906382
AUUGCAC	1.903301
Lef1	1.894361
Id4	1.883486
AUGGCUU	1.878788
AGUGCAA	1.861321
Sox5_Sry	1.837181
Gtf2i_Gtf2f1	1.832334
Olig2_Olig3	1.821999
Hey1_Myc_Mxi1	1.812037
E2f1	1.811082
GAGGUAG	1.809931
GGCAGUG	1.759051
Hoxa4	1.756993
Xbp1_Creb3l1	1.752559
Ahr	1.746641
Tgif1_Meis3	1.738523
Stat5a	1.734526
Tcf7l1	1.729464
Rest	1.729232
ACAUUCA	1.728833
GUAAACA	1.728128
Hlx	1.722906
Foxp1_Foxj2	1.704427
Mzf1	1.683287
Insm1	1.679734
AAGGCAC	1.676207
Nfe2_Bach1_Mafk	1.668944
Pax2	1.664215
Bptf	1.654335
Hmx1	1.646076
Tfap4	1.640985
Clock	1.634597
Klf13	1.633891
Klf16_Sp8	1.621587
Six6	1.618499
Etv6	1.614674
Hcfc1_Six5_Smarcc2_Zfp143	1.614662
Zfp110	1.614395
Onecut2_Onecut3	1.614349
Mafa	1.608316
Nr1h4	1.604114
Elf3	1.597698
Pax5	1.584593
Isl2	1.576829
Zfp784	1.570204
Atf4	1.568685
Hoxc9	1.568303
Tgif2_Tgif2lx1_Tgif2lx2	1.559160
Egr1	1.555298
Atf1_Creb5	1.554942
CCCUGAG	1.547528
Stat2	1.544219
Nfe2l1_Mafg	1.543475
E2f6	1.540927
Junb_Jund	1.538148
Pou3f4	1.536529
Klf4_Sp3	1.535621
ACAGUAC	1.525396
Nr1i2	1.520840
Scrt1	1.517409
Creb1	1.509365
Sox14	1.508795
Smarcc1_Fosl1	1.504700
Ets1	1.501498
Rorc_Nr1d1	1.495127
Dlx1	1.487751
Ctcfl_Ctcf	1.487468
Spib	1.481777
E2f3	1.480621
GGCUCAG	1.471567
Emx1_Emx2	1.468540
Zbtb7c	1.466392
Hsf1	1.461544
Nrf1	1.460561
Ybx1_Nfya_Nfyb_Nfyc_Cebpz	1.458846
Esrrg	1.454290
Zic3	1.447288
Zbtb18	1.445954
E2f4	1.441253
Hbp1	1.440893
UCACAUU	1.439524
Mtf1	1.439184
Sp100	1.436489
Pitx3	1.427894
Hand1	1.423376
UAUUGCU	1.419271
Zic4	1.410538
Hoxa13	1.408825
Hoxc4_Arx_Otp_Esx1_Phox2b	1.407993
UUGGUCC	1.401003
Pou3f2	1.400055
Ubp1	1.398712
Irf4	1.398232
Gcm2	1.394795
Irf3	1.394747
Atoh1_Bhlhe23	1.389778
Meox1	1.389311
Ar	1.387552
Nfic_Nfib	1.381975
Egr3	1.371425
T	1.370622
Myb	1.370400
Cebpe	1.366230
Glis3	1.366195
Nkx6-1_Evx1_Hesx1	1.365369
Klf6_Patz1	1.354497
Tcf4_Mesp1	1.353187
Klf7	1.350497
Nr4a3	1.348122
Rarg	1.347192
Hsfy2	1.333224
Hoxa9_Hoxb9	1.325203
Max_Mycn	1.319811
Mbd2	1.317745
Spi1	1.316853
Gsx1_Alx1_Mixl1_Lbx2	1.309927
Sox6_Sox9	1.309141
Ppara	1.298629
Pou4f1_Pou6f1	1.295202
Hoxa7_Hoxc8	1.295175
Dlx5_Dlx4	1.291436
Tfdp1_Wt1_Egr2	1.285700
Myf6	1.281992
Vsx2_Dlx3	1.277124
Hivep1	1.256466
Rela_Rel_Nfkb1	1.252880
Tfcp2	1.249688
AACACUG	1.248422
Ascl2	1.247095
Neurog2	1.244551
Nfkb2	1.243392
Zfp524	1.240215
Nfat5	1.237934
Etv4	1.212871
Taf1	1.212311
Figla	1.206296
Foxc2	1.205130
Zbtb16	1.204159
Esr1	1.189554
Hnf4g	1.182947
UGAAAUG	1.181506
Smad1	1.173739
Hinfp	1.172209
Glis2	1.171280
Zbtb4	1.170238
Zscan4c	1.163536
Tlx2	1.156506
Mef2d_Mef2a	1.148657
Srf	1.144878
Tead1	1.141180
Hoxd11_Cdx1_Hoxc11	1.137313
Hes1	1.134358
Hoxd1	1.133176
Mnt	1.132578
Stat4_Stat3_Stat5b	1.130186
Nr2f2	1.129685
E2f8	1.127500
Zic2	1.121325
Runx2_Bcl11a	1.118718
Hnf1b	1.116521
Bbx	1.115310
Maz_Zfp281	1.110621
Vdr	1.109155
Tcf21_Msc	1.108628
Foxq1	1.108084
AAUACUG	1.106443
Neurod2_Bhlha15_Bhlhe22_Olig1	1.101984
CACAGUG	1.100710
Rxrb	1.099697
Pax6	1.099516
Foxi1_Foxo1	1.097149
Nkx3-2	1.095173
Epas1_Bcl3	1.090459
En1	1.086707
Crem_Jdp2	1.082909
Bcl6b	1.081684
Isl1	1.075510
Ebf1	1.074591
Tal1	1.073433
Prop1	1.068149
Foxo6	1.066266
Gsc2_Dmbx1	1.065581
Irf5_Irf6	1.058240
Irx5	1.050680
Tbx15	1.049171
Hes5_Hes7	1.043821
Ep300	1.043442
Vsx1_Uncx_Prrx2_Shox2_Noto	1.041510
Foxm1	1.036826
Alx4	1.031952
Fos	1.030921
GCAGCAU	1.026492
Zbtb7a	1.026322
Zfp105	1.020960
Hmx2	1.014181
Klf8	1.002837
CUUUGGU	0.999032
Rfx5	0.992054
Nkx6-3_Dbx2_Barx2	0.987318
AAGGUGC	0.973081
Pou2f2_Pou3f1	0.970042
Ezh2_Atf2_Ikzf1	0.966103
Nfatc4	0.965548
Prrx1_Isx_Prrxl1	0.964739
Hnf1a	0.963249
Msx2_Hoxd4	0.960569
Esrrb_Esrra	0.958750
Tlx1	0.958183
AUGGCAC	0.948945
GAGAUGA	0.946949
Mybl2	0.942956
Cbfb	0.940578
UUGGCAA	0.936869
Tfcp2l1	0.934156
Meox2	0.927372
AGGUAGU	0.926235
Hey2	0.925811
Sox7	0.925555
UCACAGU	0.923772
UGCAUUG	0.917872
Zfhx3	0.913397
Spic	0.909867
Hoxd12	0.908762
Gata6	0.908707
Hmga1	0.905462
Cpeb1	0.900006
Grhl1	0.898304
Zfp148	0.897709
Klf1	0.895198
Foxp2_Foxp3	0.893693
Gata2_Gata1	0.893172
Hoxb3	0.892472
Hsf4	0.890346
Ptf1a	0.889043
Sox17	0.887059
Jun	0.884266
Hoxc10	0.883731
UAAUGCU	0.879738
Cux1	0.876125
Cebpa_Cebpg	0.868115
Atf3	0.863610
Runx1	0.863260
UGCAUAG	0.860402
Hoxd10	0.860186
Zfp384	0.857119
Nanog	0.854978
Meis1	0.854793
Tbx19	0.846018
GAUUGUC	0.843941
Ddit3	0.840446
E2f7	0.839641
Foxc1	0.835045
Hoxc13_Hoxd13	0.834071
GUAACAG	0.832022
Rhox4e_Rhox6_Vax2	0.827768
AGCAGCA	0.827601
Pou6f2_Pou4f2	0.824940
Trp53	0.823958
Obox1	0.823205
Pax3	0.820533
Prox1	0.819649
Hoxb8_Pdx1	0.816774
Lhx4	0.813087
Cebpb	0.812447
Homez	0.806830
Esr2	0.805587
Lhx3	0.800742
Nkx2-9	0.799088
Cenpb	0.798409
Otx1	0.797805
Foxb1	0.794755
Klf3	0.793748
Creb3	0.784020
Etv3_Erf_Fev_Elk4_Elk1_Elk3	0.781566
Tbr1	0.780131
Pou2f1	0.771395
Foxg1	0.767099
Zfp423	0.766009
Hoxa10	0.765137
Nr2e1	0.761659
Atf5	0.760578
Bcl6	0.760558
Batf3	0.756680
Myog_Tcf12	0.750687
CCUUCAU	0.748068
Mga	0.734441
Foxf1	0.733592
CCAGUGU	0.733335
Obox3	0.729493
Rhox11	0.725622
Barhl2	0.725441
Nkx6-2	0.721118
En2	0.717498
Rbpj	0.717363
Bsx	0.717039
Foxo3	0.712688
Zfp652	0.708921
Foxo4	0.707363
Zkscan1	0.705553
Creb3l2	0.702356
Hif1a	0.700474
Gbx1_Nobox_Alx3	0.698120
Hoxb13	0.698066
Tfap2a	0.693871
ACCCUGU	0.684847
Prdm1	0.682968
Smad4	0.680277
Evx2	0.679079
Myod1	0.670735
Nfatc2	0.669355
Mef2b	0.668180
Sox21	0.665353
Hmga2	0.662090
Obox6_Obox5	0.660954
Six4	0.659266
ACUGGCC	0.658069
Klf15	0.657356
Brca1	0.652897
GUCAGUU	0.652583
GCUACAU	0.651502
Gmeb1	0.651332
Sox3_Sox10	0.644805
ACAGUAU	0.643678
Osr2_Osr1	0.642563
Pax1_Pax9	0.639982
Aire	0.639199
Zfp263	0.637349
AGCUUAU	0.636608
Gata5	0.634023
Gfi1_Gfi1b	0.632841
Six3_Six1_Six2	0.632043
Mnx1_Lhx6_Lmx1a	0.626851
Tfap2b	0.624787
Nkx2-5	0.624142
Tfap2e	0.618643
Fubp1	0.618036
Rreb1	0.615443
GGAAUGU	0.613791
Hoxb5	0.608519
Nr4a2	0.608200
Arid3a	0.606146
UCCAGUU	0.606117
Fosl2_Bach2	0.605895
Trp73	0.600945
Nkx2-1	0.599747
Lhx8	0.597901
GGCAAGA	0.596540
Cdx2	0.592336
GUGCAAA	0.590101
Nkx1-1_Nkx1-2	0.588672
Spdef	0.584960
Zbtb12	0.583971
Tbx3	0.577903
Pou4f3	0.576736
Ebf3	0.574181
Hnf4a	0.573349
AGCAGCG	0.569921
Nr2c1	0.569738
Cebpd	0.568942
Gata4	0.563119
Zbtb6	0.562993
Zbtb7b	0.561702
Rora	0.558331
Gli3_Zic1	0.555199
Stat6	0.554445
Sox30	0.545246
Nr6a1	0.545236
Foxl1	0.540571
Pparg_Rxrg	0.538393
Nr0b1	0.534550
Zbtb14	0.534145
Nkx2-3	0.524957
Zfp410	0.522454
Tbx1_Eomes	0.519927
Gcm1	0.518295
UUGUUCG	0.516902
AACAGUC	0.513816
Msx3	0.513227
Hsf2	0.510487
Fosb	0.509479
Nr3c2	0.507298
Pax4	0.500530
Hoxb4	0.498541
Hoxa1	0.498318
Foxd1	0.498118
Smad3	0.496659
CCAGCAU	0.490948
Barhl1	0.486312
Thra	0.485482
Gmeb2	0.485233
Meis2	0.482622
Pbx2	0.482023
Nkx2-6	0.480476
GUAGUGU	0.474183
Zfp691	0.473476
Nkx3-1	0.467033
Cdc5l	0.465662
Foxf2	0.463603
UCCCUUU	0.460223
Sin3a	0.458292
Tfap2c	0.456190
Nr2c2	0.453081
Batf	0.450356
Pitx2_Otx2	0.448735
Snai1_Zeb1_Snai2	0.447231
Ppard	0.446615
Sox15	0.445055
Arid5a	0.445035
Nr1h2	0.436858
Tbx2	0.435847
Relb	0.433163
Hlf	0.433058
Hoxb6	0.430047
Hoxd9	0.429353
Nfatc3	0.425817
Egr4	0.420657
Pgr_Nr3c1	0.420125
Zkscan3	0.417658
Foxd2	0.417365
Sox8	0.414585
Maff	0.409232
Mecom	0.406692
Rxra	0.405057
Hoxc6	0.404724
Scrt2	0.404108
Sox11	0.397208
Gli1	0.397203
Runx3	0.383077
Zbtb49	0.380728
Hoxa11_Hoxc12	0.379828
AGUGGUU	0.379339
AGCACCA	0.377828
Zbtb33_Chd2	0.377662
Gsx2_Hoxd3_Vax1	0.375859
Pitx1	0.374281
Tcf3	0.374218
Arid5b	0.371177
Rara	0.367405
Sox1	0.365515
AAGUGCU	0.364901
Nr5a2	0.364549
Nkx2-2	0.363325
Pknox2_Pknox1	0.362650
Hoxb2_Dlx2	0.360773
Smad2	0.360003
Rarb	0.358317
Irx4	0.357580
Hmbox1	0.342784
Foxk1_Foxj1	0.340578
Sp2	0.337135
ACUGCAU	0.328292
UAAGACG	0.327585
Thrb	0.326369
Mafb	0.325746
Ikzf2	0.322548
Foxd3	0.316930
Elf5	0.316843
Tbx4	0.305158
Twist1	0.297829
Mybl1	0.289833
Zbtb3	0.287710
GGAAGAC	0.282101
Bhlhe40	0.270760
Sox13	0.267122
AAAGUGC	0.264838
AUGUGCC	0.264467
Trp63	0.264122
GAUAUGU	0.260358
Dbp	0.259929
Crx_Gsc	0.255430
UGACCUA	0.253455
CAGUGCA	0.247596
Zfp128	0.247277
Cxxc1	0.246740
Lhx5_Lmx1b_Lhx1	0.242456
Ehf	0.242318
Nr2f6	0.241169
Hoxd8	0.239712
Sox18_Sox12	0.239646
Prdm14	0.239462
Sox4	0.238251
Pax8	0.236675
Pou3f3	0.233864
Hoxa5	0.232678
Hmx3	0.230465
Tbx21	0.222778
Prdm4	0.219702
Pax7	0.219215
GCUGGUG	0.218833
AAUCUCU	0.211408
Maf_Nrl	0.209068
UAAGACU	0.206672
GAUCAGA	0.203712
Tbx20	0.200617
Hoxb1	0.199961
Arnt2	0.189317
AACCUGG	0.187776
AGCUGCC	0.185284
Arnt	0.180792
Zfp282	0.172840
CUACAGU	0.171859
Nhlh1	0.167490
Gli2	0.160114
Atf7_E4f1	0.146063
AAUCUCA	0.145832
Phox2a	0.145014
Ovol1	0.142826
Gbx2	0.142810
Foxn1	0.140477
Hic2	0.132137
Foxa3	0.120238
Stat1	0.116964
Plagl1	0.109039
Gzf1	0.101944
Nr2f1_Nr4a1	0.100666
AUGACAC	0.100321
GGAGUGU	0.093811
GAGAACU	0.092080
AAUGCCC	0.085338
UGUGCGU	0.083862
Hoxa3	0.073526
AACCGUU	0.069813
Glis1	0.054916
AACGGAA	0.041464
GGACGGA	0.039265
CGUGUCU	0.027317
CUCCCAA	0.011216
