# Supplementary material for: Transcriptional cooperation of PBX1 and PAX6 in adult neural progenitor cells
Source: Sci Rep. 2021 Oct 25;11:21013. doi: 10.1038/s41598-021-99968-5 (PMC8545929; doi:10.1038/s41598-021-99968-5)
Supplement: Supplementary file 8 — Supplementary Table 7. [file 41598_2021_99968_MOESM8_ESM.xlsx]

## Sheet: Table S7
Supplementary Table 7	Gene overrepresentation in biological process category exported from ISMARA for the Rfx3_Rfx1_Rfx4 motifs
Log-likelihood per target	Total log-likelihood	Term	Description
0.1	30.6	GO:0060271	cilium morphogenesis(GO:0060271)
0.3	12.4	GO:0042073	intraciliary transport(GO:0042073)
0.4	10.4	GO:0000413	protein peptidyl-prolyl isomerization(GO:0000413)
0.2	10.4	GO:0035082	axoneme assembly(GO:0035082)
1.8	9.2	GO:0032423	regulation of mismatch repair(GO:0032423)
0.8	9.1	GO:0002318	myeloid progenitor cell differentiation(GO:0002318)
1.7	8.3	GO:0061141	lung ciliated cell differentiation(GO:0061141)
0.7	8	GO:0061302	smooth muscle cell-matrix adhesion(GO:0061302)
1.6	7.9	GO:0035720	intraciliary anterograde transport(GO:0035720)
0.3	7.9	GO:0016486	peptide hormone processing(GO:0016486)
1.6	7.8	GO:0090038	negative regulation of protein kinase C signaling(GO:0090038)
1.5	7.5	GO:0021508	floor plate formation(GO:0021508)
1.2	7.2	GO:1904491	protein localization to ciliary transition zone(GO:1904491)
2.4	7.1	GO:0071918	urea transmembrane transport(GO:0071918)
1.2	6	GO:0042360	vitamin E metabolic process(GO:0042360)
0.7	5.9	GO:0035610	protein side chain deglutamylation(GO:0035610)
0.4	5.6	GO:0021869	forebrain ventricular zone progenitor cell division(GO:0021869)
1.4	5.4	GO:0008594	photoreceptor cell morphogenesis(GO:0008594)
0.3	5.4	GO:0016188	synaptic vesicle maturation(GO:0016188)
1.1	4.6	GO:1903031	regulation of microtubule plus-end binding(GO:1903031) positive regulation of microtubule plus-end binding(GO:1903033)
0.2	4.6	GO:0016578	histone deubiquitination(GO:0016578)
0.9	4.5	GO:2000325	regulation of ligand-dependent nuclear receptor transcription coactivator activity(GO:2000325) positive regulation of ligand-dependent nuclear receptor transcription coactivator activity(GO:2000327)
0.4	4.5	GO:0035845	photoreceptor cell outer segment organization(GO:0035845)
0.3	4.3	GO:0060294	cilium movement involved in cell motility(GO:0060294)
0	4.2	GO:0030509	BMP signaling pathway(GO:0030509)
0.1	4	GO:0006890	retrograde vesicle-mediated transport, Golgi to ER(GO:0006890)
0.2	3.7	GO:0048642	negative regulation of skeletal muscle tissue development(GO:0048642)
0.1	3.6	GO:0045063	T-helper 1 cell differentiation(GO:0045063)
0.9	3.4	GO:2001106	regulation of Rho guanyl-nucleotide exchange factor activity(GO:2001106)
0.1	3.1	GO:0099517	anterograde synaptic vesicle transport(GO:0048490) synaptic vesicle cytoskeletal transport(GO:0099514) synaptic vesicle transport along microtubule(GO:0099517)
0	3.1	GO:0021795	cerebral cortex cell migration(GO:0021795)
0	3.1	GO:1903955	positive regulation of protein targeting to mitochondrion(GO:1903955)
0.1	3	GO:0046686	response to cadmium ion(GO:0046686)
0.2	2.9	GO:0006744	ubiquinone biosynthetic process(GO:0006744)
0.2	2.8	GO:1901620	regulation of smoothened signaling pathway involved in dorsal/ventral neural tube patterning(GO:1901620)
0.9	2.7	GO:1903644	regulation of chaperone-mediated protein folding(GO:1903644)
0.7	2.7	GO:0030860	regulation of polarized epithelial cell differentiation(GO:0030860)
0.4	2.6	GO:0032914	positive regulation of transforming growth factor beta1 production(GO:0032914)
0.1	2.6	GO:0097484	dendrite extension(GO:0097484)
0.4	2.5	GO:0007258	JUN phosphorylation(GO:0007258)
0	2.5	GO:0010923	negative regulation of phosphatase activity(GO:0010923)
0.8	2.4	GO:0010387	COP9 signalosome assembly(GO:0010387)
0.8	2.3	GO:1903348	positive regulation of bicellular tight junction assembly(GO:1903348)
0.8	2.3	GO:2000845	positive regulation of testosterone secretion(GO:2000845)
0.3	2.3	GO:0006685	sphingomyelin catabolic process(GO:0006685)
0.1	2.2	GO:0034315	regulation of Arp2/3 complex-mediated actin nucleation(GO:0034315)
0.1	2.2	GO:0045648	positive regulation of erythrocyte differentiation(GO:0045648)
0	2.2	GO:0000271	polysaccharide biosynthetic process(GO:0000271)
0.7	2.1	GO:0042723	thiamine metabolic process(GO:0006772) thiamine-containing compound metabolic process(GO:0042723)
0.4	2.1	GO:1904073	regulation of trophectodermal cell proliferation(GO:1904073) positive regulation of trophectodermal cell proliferation(GO:1904075)
0.1	2.1	GO:0003341	cilium movement(GO:0003341)
0.3	2	GO:0006287	base-excision repair, gap-filling(GO:0006287)
0.3	2	GO:0071557	histone H3-K27 demethylation(GO:0071557)
0.2	2	GO:0090148	membrane fission(GO:0090148)
0	2	GO:0051489	regulation of filopodium assembly(GO:0051489)
0.1	1.9	GO:0071801	regulation of podosome assembly(GO:0071801)
0.1	1.9	GO:0034308	primary alcohol metabolic process(GO:0034308)
0	1.9	GO:0007631	feeding behavior(GO:0007631)
0.6	1.8	GO:0097402	neuroblast migration(GO:0097402)
0.4	1.8	GO:0015886	heme transport(GO:0015886)
0.3	1.8	GO:0044375	regulation of peroxisome size(GO:0044375)
0.2	1.8	GO:0071494	cellular response to UV-C(GO:0071494)
0.2	1.8	GO:0099590	neurotransmitter receptor internalization(GO:0099590)
0.1	1.8	GO:0061469	regulation of type B pancreatic cell proliferation(GO:0061469)
0.1	1.8	GO:2000300	regulation of synaptic vesicle exocytosis(GO:2000300)
0.6	1.7	GO:0018199	peptidyl-glutamine modification(GO:0018199)
0.6	1.7	GO:0045763	regulation of arginine metabolic process(GO:0000821) negative regulation of nitric oxide mediated signal transduction(GO:0010751) negative regulation of cellular amino acid metabolic process(GO:0045763)
0.6	1.7	GO:0046122	purine deoxyribonucleoside metabolic process(GO:0046122)
0.3	1.7	GO:1902412	regulation of mitotic cytokinesis(GO:1902412)
0.3	1.7	GO:0061641	CENP-A containing nucleosome assembly(GO:0034080) CENP-A containing chromatin organization(GO:0061641)
0.2	1.7	GO:0060287	epithelial cilium movement involved in determination of left/right asymmetry(GO:0060287)
0.2	1.7	GO:0015862	uridine transport(GO:0015862)
0.2	1.7	GO:1990253	response to leucine(GO:0043201) cellular response to leucine(GO:0071233) cellular response to leucine starvation(GO:1990253)
0.2	1.7	GO:0032261	purine nucleotide salvage(GO:0032261) IMP salvage(GO:0032264)
0.2	1.7	GO:0070236	negative regulation of activation-induced cell death of T cells(GO:0070236)
0	1.7	GO:0035458	cellular response to interferon-beta(GO:0035458)
0	1.7	GO:0007368	determination of left/right symmetry(GO:0007368)
0	1.7	GO:0008643	carbohydrate transport(GO:0008643)
0.3	1.6	GO:0035247	peptidyl-arginine omega-N-methylation(GO:0035247)
0.2	1.6	GO:0090503	RNA phosphodiester bond hydrolysis, exonucleolytic(GO:0090503)
0.1	1.6	GO:0045719	negative regulation of glycogen biosynthetic process(GO:0045719)
0.1	1.6	GO:0070389	chaperone cofactor-dependent protein refolding(GO:0070389)
0.1	1.6	GO:0031954	positive regulation of protein autophosphorylation(GO:0031954)
0	1.6	GO:0008654	phospholipid biosynthetic process(GO:0008654)
0.5	1.5	GO:1900477	negative regulation of G1/S transition of mitotic cell cycle by negative regulation of transcription from RNA polymerase II promoter(GO:1900477)
0.3	1.5	GO:1903750	regulation of intrinsic apoptotic signaling pathway in response to hydrogen peroxide(GO:1903750) negative regulation of intrinsic apoptotic signaling pathway in response to hydrogen peroxide(GO:1903751)
0.2	1.5	GO:0061635	regulation of protein complex stability(GO:0061635)
0.2	1.5	GO:0000042	protein targeting to Golgi(GO:0000042)
0.1	1.5	GO:0006654	phosphatidic acid biosynthetic process(GO:0006654)
0.1	1.5	GO:0032516	positive regulation of phosphoprotein phosphatase activity(GO:0032516)
0.1	1.5	GO:0043968	histone H2A acetylation(GO:0043968)
0	1.5	GO:0030488	tRNA methylation(GO:0030488)
0	1.5	GO:0045773	positive regulation of axon extension(GO:0045773)
0.1	1.4	GO:0006895	Golgi to endosome transport(GO:0006895)
0.1	1.4	GO:2000480	negative regulation of cAMP-dependent protein kinase activity(GO:2000480)
0.1	1.4	GO:0031573	intra-S DNA damage checkpoint(GO:0031573)
0.1	1.4	GO:1901741	positive regulation of myoblast fusion(GO:1901741)
0	1.4	GO:0006767	water-soluble vitamin metabolic process(GO:0006767)
0	1.4	GO:0045494	photoreceptor cell maintenance(GO:0045494)
0	1.4	GO:0071300	cellular response to retinoic acid(GO:0071300)
0.4	1.3	GO:0090158	endoplasmic reticulum membrane organization(GO:0090158)
0.3	1.3	GO:1902477	defense response to bacterium, incompatible interaction(GO:0009816) regulation of defense response to bacterium, incompatible interaction(GO:1902477)
0.1	1.3	GO:2001223	negative regulation of neuron migration(GO:2001223)
0.1	1.3	GO:0035641	locomotory exploration behavior(GO:0035641)
0	1.3	GO:0046513	ceramide biosynthetic process(GO:0046513)
0.2	1.2	GO:0051684	maintenance of Golgi location(GO:0051684)
0.2	1.2	GO:0036066	protein O-linked fucosylation(GO:0036066)
0.2	1.2	GO:0030382	sperm mitochondrion organization(GO:0030382)
0.1	1.2	GO:0047484	regulation of response to osmotic stress(GO:0047484)
0.1	1.2	GO:0045821	positive regulation of glycolytic process(GO:0045821)
0.1	1.2	GO:0048312	intracellular distribution of mitochondria(GO:0048312)
0	1.2	GO:0010972	negative regulation of G2/M transition of mitotic cell cycle(GO:0010972)
0	1.2	GO:0007569	cell aging(GO:0007569)
0.4	1.1	GO:0098501	polynucleotide dephosphorylation(GO:0098501)
0.3	1.1	GO:0046909	intermembrane transport(GO:0046909) protein transport from ciliary membrane to plasma membrane(GO:1903445)
0.3	1.1	GO:0061762	CAMKK-AMPK signaling cascade(GO:0061762)
0.2	1.1	GO:0071027	nuclear RNA surveillance(GO:0071027) nuclear mRNA surveillance(GO:0071028)
0.1	1.1	GO:0006002	fructose 6-phosphate metabolic process(GO:0006002)
0	1.1	GO:0060712	spongiotrophoblast layer development(GO:0060712)
0	1.1	GO:0006336	DNA replication-independent nucleosome assembly(GO:0006336)
0	1.1	GO:0051353	positive regulation of oxidoreductase activity(GO:0051353)
0.3	1	GO:0043602	nitrate catabolic process(GO:0043602) nitric oxide catabolic process(GO:0046210) cellular organohalogen metabolic process(GO:0090345) cellular organofluorine metabolic process(GO:0090346)
0.3	1	GO:0009182	purine deoxyribonucleoside diphosphate metabolic process(GO:0009182) dGDP metabolic process(GO:0046066)
0.2	1	GO:1903575	cornified envelope assembly(GO:1903575)
0.1	1	GO:0051085	chaperone mediated protein folding requiring cofactor(GO:0051085)
0.1	1	GO:0090036	regulation of protein kinase C signaling(GO:0090036)
0.1	1	GO:0021707	cerebellar granular layer formation(GO:0021684) cerebellar granule cell differentiation(GO:0021707)
0	1	GO:0042147	retrograde transport, endosome to Golgi(GO:0042147)
0.2	0.9	GO:0035470	positive regulation of vascular wound healing(GO:0035470) regulation of vascular wound healing(GO:0061043)
0.2	0.9	GO:0007113	endomitotic cell cycle(GO:0007113) thrombopoietin-mediated signaling pathway(GO:0038163) positive regulation of male germ cell proliferation(GO:2000256)
0.2	0.9	GO:0032792	negative regulation of CREB transcription factor activity(GO:0032792)
0.2	0.9	GO:1900425	negative regulation of defense response to bacterium(GO:1900425)
0.2	0.9	GO:1901509	regulation of endothelial tube morphogenesis(GO:1901509)
0.2	0.9	GO:0046102	ADP biosynthetic process(GO:0006172) purine nucleoside diphosphate biosynthetic process(GO:0009136) purine ribonucleoside diphosphate biosynthetic process(GO:0009180) inosine metabolic process(GO:0046102) inosine biosynthetic process(GO:0046103)
0.2	0.9	GO:0030913	paranodal junction assembly(GO:0030913)
0.1	0.9	GO:0031087	deadenylation-independent decapping of nuclear-transcribed mRNA(GO:0031087)
0	0.9	GO:1902260	negative regulation of delayed rectifier potassium channel activity(GO:1902260)
0	0.9	GO:0018345	protein palmitoylation(GO:0018345)
0	0.9	GO:0032011	ARF protein signal transduction(GO:0032011) regulation of ARF protein signal transduction(GO:0032012)
0	0.9	GO:0045669	positive regulation of osteoblast differentiation(GO:0045669)
0	0.9	GO:0032355	response to estradiol(GO:0032355)
0	0.9	GO:0045454	cell redox homeostasis(GO:0045454)
0	0.9	GO:0042035	regulation of cytokine biosynthetic process(GO:0042035)
0.3	0.8	GO:0048611	ectodermal digestive tract development(GO:0007439) embryonic ectodermal digestive tract development(GO:0048611)
0.2	0.8	GO:0090182	regulation of secretion of lysosomal enzymes(GO:0090182) positive regulation of pancreatic juice secretion(GO:0090187)
0.2	0.8	GO:0006420	arginyl-tRNA aminoacylation(GO:0006420)
0.2	0.8	GO:0006538	glutamate catabolic process(GO:0006538)
0.1	0.8	GO:0035331	negative regulation of hippo signaling(GO:0035331)
0.1	0.8	GO:0090073	positive regulation of protein homodimerization activity(GO:0090073)
0.1	0.8	GO:0010838	positive regulation of keratinocyte proliferation(GO:0010838)
0.1	0.8	GO:0071712	ER-associated misfolded protein catabolic process(GO:0071712)
0.1	0.8	GO:0035970	peptidyl-threonine dephosphorylation(GO:0035970)
0	0.8	GO:2000311	regulation of alpha-amino-3-hydroxy-5-methyl-4-isoxazole propionate selective glutamate receptor activity(GO:2000311)
0	0.8	GO:2001273	regulation of glucose import in response to insulin stimulus(GO:2001273)
0	0.8	GO:1990845	adaptive thermogenesis(GO:1990845)
0	0.8	GO:0035518	histone H2A monoubiquitination(GO:0035518)
0	0.8	GO:0008045	motor neuron axon guidance(GO:0008045)
0	0.8	GO:0006360	transcription from RNA polymerase I promoter(GO:0006360)
0	0.8	GO:0046626	regulation of insulin receptor signaling pathway(GO:0046626)
0.2	0.7	GO:1901856	negative regulation of cellular respiration(GO:1901856)
0.2	0.7	GO:0046340	diacylglycerol catabolic process(GO:0046340) retrograde trans-synaptic signaling(GO:0098917)
0.2	0.7	GO:0071043	CUT catabolic process(GO:0071034) CUT metabolic process(GO:0071043)
0.2	0.7	GO:1904457	positive regulation of neuronal action potential(GO:1904457)
0.1	0.7	GO:0043314	negative regulation of neutrophil degranulation(GO:0043314) negative regulation of blood vessel remodeling(GO:0060313)
0.1	0.7	GO:0046051	UTP biosynthetic process(GO:0006228) UTP metabolic process(GO:0046051)
0.1	0.7	GO:0032510	endosome to lysosome transport via multivesicular body sorting pathway(GO:0032510)
0	0.7	GO:0002115	store-operated calcium entry(GO:0002115)
0	0.7	GO:0035767	endothelial cell chemotaxis(GO:0035767)
0.2	0.6	GO:0045415	regulation of muscle hyperplasia(GO:0014738) muscle hyperplasia(GO:0014900) negative regulation of interleukin-8 biosynthetic process(GO:0045415)
0.1	0.6	GO:0046477	glycosylceramide catabolic process(GO:0046477)
0.1	0.6	GO:0001561	fatty acid alpha-oxidation(GO:0001561)
0.1	0.6	GO:0051409	response to nitrosative stress(GO:0051409)
0.1	0.6	GO:0030035	microspike assembly(GO:0030035)
0	0.6	GO:1900017	positive regulation of cytokine production involved in inflammatory response(GO:1900017)
0	0.6	GO:0071470	cellular response to osmotic stress(GO:0071470)
0	0.6	GO:0007099	centriole replication(GO:0007099)
0	0.6	GO:0007131	reciprocal meiotic recombination(GO:0007131) reciprocal DNA recombination(GO:0035825)
0	0.6	GO:0030317	sperm motility(GO:0030317)
0.2	0.5	GO:0045014	carbon catabolite repression of transcription(GO:0045013) negative regulation of transcription by glucose(GO:0045014)
0.2	0.5	GO:0044208	'de novo' AMP biosynthetic process(GO:0044208)
0.1	0.5	GO:0006032	chitin metabolic process(GO:0006030) chitin catabolic process(GO:0006032)
0.1	0.5	GO:0035752	lysosomal lumen pH elevation(GO:0035752)
0.1	0.5	GO:0015014	heparan sulfate proteoglycan biosynthetic process, polysaccharide chain biosynthetic process(GO:0015014)
0.1	0.5	GO:0006627	protein processing involved in protein targeting to mitochondrion(GO:0006627)
0.1	0.5	GO:0034770	histone H4-K20 methylation(GO:0034770)
0.1	0.5	GO:2000010	positive regulation of protein localization to cell surface(GO:2000010)
0	0.5	GO:0051382	kinetochore assembly(GO:0051382)
0	0.5	GO:0060135	maternal process involved in female pregnancy(GO:0060135)
0	0.5	GO:0032092	positive regulation of protein binding(GO:0032092)
0.1	0.4	GO:0070973	protein localization to endoplasmic reticulum exit site(GO:0070973)
0.1	0.4	GO:0014873	response to muscle activity involved in regulation of muscle adaptation(GO:0014873)
0.1	0.4	GO:2000304	positive regulation of sphingolipid biosynthetic process(GO:0090154) positive regulation of ceramide biosynthetic process(GO:2000304)
0.1	0.4	GO:1900220	semaphorin-plexin signaling pathway involved in bone trabecula morphogenesis(GO:1900220)
0.1	0.4	GO:0070278	extracellular matrix constituent secretion(GO:0070278)
0.1	0.4	GO:0033540	fatty acid beta-oxidation using acyl-CoA oxidase(GO:0033540)
0.1	0.4	GO:2000002	negative regulation of DNA damage checkpoint(GO:2000002)
0	0.4	GO:0039532	negative regulation of viral-induced cytoplasmic pattern recognition receptor signaling pathway(GO:0039532)
0	0.4	GO:0046325	negative regulation of glucose import(GO:0046325)
0	0.4	GO:0060219	camera-type eye photoreceptor cell differentiation(GO:0060219)
0	0.4	GO:0007220	Notch receptor processing(GO:0007220)
